# Supplementary material for: Brainstem Organoids From Human Pluripotent Stem Cells
Source: Front Neurosci. 2020 Jun 26;14:538. doi: 10.3389/fnins.2020.00538 (PMC7332712; doi:10.3389/fnins.2020.00538)
Supplement: Supplementary file 2 [file Table_1.xlsx]

## Sheet: Sheet1
Supplemental Table 1: Antibodies used for immunohistochemical staining.
Antibody	Host species	Company	Cat. No	Dilution
OTX2	Rabbit	Abcam	ab21990	1:1000
TH	Mouse	ImmunoStar	22941	1:4000
SOX2	Rabbit	Cell Signaling Technology	23064S	1:400
DBH	Goat	Abcam	ab189991	1:100
ChAT	Goat	Millipore	AB144P	1:100
TUJ1	Mouse	Sigma-Aldrich	T8660	1:400
GBX2	Goat	Abcam	ab109726	1:200
SOX9	Rabbit	Millipore	AB5535	1:200
