# Supplementary material for: Brainstem Organoids From Human Pluripotent Stem Cells
Source: Front Neurosci. 2020 Jun 26;14:538. doi: 10.3389/fnins.2020.00538 (PMC7332712; doi:10.3389/fnins.2020.00538)
Supplement: Supplementary file 4 [file Table_3.xlsx]

## Sheet: Sheet1
Supplemental Table 3: Mean threshold cycle (Ct) values of 1-month old hBSO from hESCs in quantitative polymerase chain reaction analysis.
Plate1				Plate 2		Plate 3		Plate 4		Plate 5		Plate 6		Plate 7		Plate 8		Plate 9		Plate 10		Plate 11		Plate 12		Plate 13		Plate 14		Plate 15		Plate 16		Plate 17		Plate 18		Plate 19		Plate 20		Plate 21		Plate 22		Plate 23		Plate 24
Sample	Sample number	Gene	Ct Mean	Gene	Ct Mean	Gene	Ct Mean	Gene	Ct Mean	Gene	Ct Mean	Gene	Ct Mean	Gene	Ct Mean	Gene	Ct mean	Gene	Ct Mean	Gene	Ct Mean	Gene	Ct Mean	Gene	Ct Mean	Gene	Ct Mean	Gene	Ct Mean	Gene	Ct Mean	Gene	Ct Mean	Gene	Ct Mean	Gene	Ct Mean	Gene	Ct Mean	Gene	Ct Mean	Gene	Ct Mean	Gene	Ct Mean	Gene	Ct Mean	Gene	Ct Mean
hESC	Sample 1	SOX2	24.3823	ASCL1	34.1686	SLC3A1	28.7389	OTX2	26.7629	FOXA2	32.4645	NR4A2	33.3113	MAP2	29.7132	TH	36.7164	ChAT	34.7694	VGLUT1	31.9812	GAD67	36.5689	OLIG2	33.0474	MBP	31.6978	S100β	32.143	RPL32	18.3661	DAT	33.5962	PITX3	30.9784	EN2	35.1434	DDC	32.0293	OTX1	30.4771	TLE4	26.3814	CALB1	25.9602	CORIN	31.037	SOX6	33.3379
hESC	Sample 2	SOX2	22.8359	ASCL1	32.8854	SLC3A1	27.5498	OTX2	26.8556	FOXA2	31.784	NR4A2	32.1929	MAP2	28.48	TH	35.5515	ChAT	34.571	VGLUT1	33.2923	GAD67	34.7416	OLIG2	31.8344	MBP	30.9565	S100β	32.5557	RPL32	18.9966	DAT	32.2816	PITX3	31.2177	EN2	34.6585	DDC	32.8328	OTX1	30.7293	TLE4	27.429	CALB1	26.5831	CORIN	31.4198	SOX6	33.0263
hESC	Sample 3	SOX2	23.3336	ASCL1	32.3999	SLC3A1	27.8787	OTX2	26.8802	FOXA2	31.4637	NR4A2	33.317	MAP2	28.5745	TH	35.3873	ChAT	34.3271	VGLUT1	30.5216	GAD67	34.3802	OLIG2	30.961	MBP	30.4413	S100β	33.2615	RPL32	19.5655	DAT	31.9824	PITX3	30.5312	EN2	34.2873	DDC	34.3769	OTX1	29.7208	TLE4	26.5791	CALB1	26.4094	CORIN	30.4867	SOX6	31.8691
hESC	Sample 4	SOX2	22.4433	ASCL1	32.9373	SLC3A1	29.2601	OTX2	26.7127	FOXA2	32.319	NR4A2	35.0907	MAP2	29.3634	TH	36.4892	ChAT	34.7761	VGLUT1	33.0748	GAD67	35.4959	OLIG2	31.2987	MBP	30.9681	S100β	33.7253	RPL32	19.1929	DAT	31.5666	PITX3	31.2808	EN2	33.4273	DDC	35.7514	OTX1	29.348	TLE4	26.5855	CALB1	27.5136	CORIN	31.3835	SOX6	32.867
hBSO 1 month	Sample 5	SOX2	25.8105	ASCL1	25.3358	SLC3A1	29.6637	OTX2	24.6208	FOXA2	28.9839	NR4A2	30.0817	MAP2	25.2508	TH	25.8693	ChAT	30.8532	VGLUT1	30.6942	GAD67	30.0644	OLIG2	28.7347	MBP	27.2251	S100β	27.0963	RPL32	19.3166	DAT	32.9626	PITX3	28.7067	EN2	22.4057	DDC	24.6555	OTX1	24.9398	TLE4	25.874	CALB1	26.6735	CORIN	27.6483	SOX6	27.6649
hBSO 1 month	Sample 6	SOX2	25.6795	ASCL1	27.9727	SLC3A1	29.9774	OTX2	30.1321	FOXA2	28.0102	NR4A2	32.5757	MAP2	27.4863	TH	35.2085	ChAT	31.366	VGLUT1	30.6689	GAD67	34.6791	OLIG2	27.9785	MBP	27.6396	S100β	34.9266	RPL32	20.0197	DAT	35.4851	PITX3	27.836	EN2	32.549	DDC	34.4936	OTX1	29.5897	TLE4	26.7424	CALB1	33.8212	CORIN	27.0498	SOX6	28.8624
hBSO 1 month	Sample 7	SOX2	25.6885	ASCL1	27.98	SLC3A1	29.305	OTX2	30.1701	FOXA2	28.2022	NR4A2	32.1614	MAP2	27.5149	TH	32.8147	ChAT	31.6536	VGLUT1	30.4597	GAD67	34.2083	OLIG2	27.8351	MBP	27.5951	S100β	32.9235	RPL32	22.0162	DAT	35.4001	PITX3	27.9941	EN2	29.5112	DDC	35.9933	OTX1	29.2138	TLE4	26.7554	CALB1	33.7521	CORIN	27.4566	SOX6	29.3177
hBSO 1 month	Sample 8	SOX2	24.2984	ASCL1	23.9805	SLC3A1	31.0108	OTX2	23.8632	FOXA2	28.4854	NR4A2	32.436	MAP2	24.8114	TH	25.9592	ChAT	31.5169	VGLUT1	27.1468	GAD67	29.4005	OLIG2	28.4168	MBP	28.0323	S100β	30.5387	RPL32	18.7883	DAT	31.3779	PITX3	28.0759	EN2	24.4653	DDC	24.926	OTX1	23.6212	TLE4	25.0821	CALB1	26.9479	CORIN	26.798	SOX6	27.3898
hBSO 1 month	Sample 9	SOX2	24.5059	ASCL1	24.4464	SLC3A1	29.6916	OTX2	24.6329	FOXA2	27.1801	NR4A2	32.8073	MAP2	25.6958	TH	27.6795	ChAT	30.4845	VGLUT1	27.9008	GAD67	30.2633	OLIG2	26.8542	MBP	26.787	S100β	31.741	RPL32	20.4152	DAT	32.9353	PITX3	27.0562	EN2	25.423	DDC	26.2293	OTX1	24.9548	TLE4	25.8372	CALB1	28.1639	CORIN	26.2912	SOX6	27.4212
hBSO 1 month	Sample 10	SOX2	23.465	ASCL1	22.7973	SLC3A1	31.3098	OTX2	22.9397	FOXA2	29.3779	NR4A2	31.9689	MAP2	23.9257	TH	25.2822	ChAT	32.4284	VGLUT1	26.6456	GAD67	28.8623	OLIG2	28.9898	MBP	28.8334	S100β	29.9946	RPL32	19.4007	DAT	31.1625	PITX3	29.1475	EN2	24.0633	DDC	23.8752	OTX1	23.3339	TLE4	25.2201	CALB1	26.8553	CORIN	27.0549	SOX6	27.6299
hESC	Sample 1	ACTB	18.9365	ACTB	19.4727	ACTB	19.1299	ACTB	19.2474	ACTB	19.3645	ACTB	19.1297	ACTB	19.2474	ACTB	19.8536	ACTB	17.9316	ACTB	19.6391	ACTB	19.1297	ACTB	19.4727	ACTB	19.1299	ACTB	19.8417	ACTB	16.8631	ACTB	18.5701	ACTB	17.8322	ACTB	16.7945	ACTB	16.7945	ACTB	17.9263	ACTB	17.9263	ACTB	17.9244	ACTB	17.8322	ACTB	17.6664
hESC	Sample 2	ACTB	18.5934	ACTB	18.768	ACTB	18.6965	ACTB	18.7675	ACTB	18.7482	ACTB	18.5455	ACTB	18.7675	ACTB	20.3461	ACTB	18.8558	ACTB	19.5226	ACTB	18.5455	ACTB	18.768	ACTB	18.6965	ACTB	20.2747	ACTB	19.1044	ACTB	18.146	ACTB	18.752	ACTB	17.1477	ACTB	17.1477	ACTB	18.8149	ACTB	18.8149	ACTB	18.8738	ACTB	18.752	ACTB	18.6168
hESC	Sample 3	ACTB	18.4052	ACTB	18.6201	ACTB	18.7528	ACTB	18.4658	ACTB	18.6577	ACTB	18.4648	ACTB	18.4658	ACTB	20.7865	ACTB	18.2987	ACTB	17.5868	ACTB	18.4648	ACTB	18.6201	ACTB	18.7528	ACTB	20.8765	ACTB	19.6989	ACTB	18.0289	ACTB	18.0986	ACTB	17.7185	ACTB	17.7185	ACTB	18.0665	ACTB	18.0665	ACTB	18.1086	ACTB	18.0986	ACTB	18.0444
hESC	Sample 4	ACTB	18.4965	ACTB	18.734	ACTB	18.785	ACTB	18.837	ACTB	18.8662	ACTB	18.7238	ACTB	18.837	ACTB	20.9466	ACTB	18.6894	ACTB	19.426	ACTB	18.7238	ACTB	18.734	ACTB	18.785	ACTB	20.9371	ACTB	19.869	ACTB	18.0065	ACTB	18.4406	ACTB	17.7931	ACTB	17.7931	ACTB	18.5503	ACTB	18.5503	ACTB	18.5663	ACTB	18.4406	ACTB	18.5319
hBSO 1 month	Sample 5	ACTB	20.553	ACTB	20.8567	ACTB	20.9817	ACTB	20.7603	ACTB	20.8487	ACTB	20.865	ACTB	20.7603	ACTB	21.7021	ACTB	20.2177	ACTB	21.3615	ACTB	20.865	ACTB	20.8567	ACTB	20.9817	ACTB	21.8102	ACTB	18.9748	ACTB	20.1063	ACTB	19.9536	ACTB	18.5733	ACTB	18.5733	ACTB	19.9568	ACTB	19.9568	ACTB	20.1001	ACTB	19.9536	ACTB	19.9153
hBSO 1 month	Sample 6	ACTB	22.6089	ACTB	23.0062	ACTB	22.9393	ACTB	22.7915	ACTB	22.8013	ACTB	22.7829	ACTB	22.7915	ACTB	27.9254	ACTB	22.5283	ACTB	21.0378	ACTB	22.7829	ACTB	23.0062	ACTB	22.9393	ACTB	28.047	ACTB	21.3521	ACTB	22.1791	ACTB	22.206	ACTB	24.5259	ACTB	24.5259	ACTB	22.3142	ACTB	22.3142	ACTB	22.4281	ACTB	22.206	ACTB	22.334
hBSO 1 month	Sample 7	ACTB	22.1493	ACTB	22.5836	ACTB	22.4091	ACTB	22.3279	ACTB	22.5925	ACTB	22.4841	ACTB	22.3279	ACTB	26.6659	ACTB	21.8514	ACTB	21.1052	ACTB	22.4841	ACTB	22.5836	ACTB	22.4091	ACTB	26.6674	ACTB	25.4239	ACTB	22.0266	ACTB	21.4311	ACTB	23.3309	ACTB	23.3309	ACTB	21.5269	ACTB	21.5269	ACTB	21.5508	ACTB	21.4311	ACTB	21.6607
hBSO 1 month	Sample 8	ACTB	20.3745	ACTB	20.6902	ACTB	20.625	ACTB	20.7309	ACTB	20.6977	ACTB	20.5781	ACTB	20.7309	ACTB	21.9063	ACTB	20.3402	ACTB	19.4727	ACTB	20.5781	ACTB	20.6902	ACTB	20.625	ACTB	21.8543	ACTB	19.0029	ACTB	20.3455	ACTB	19.9684	ACTB	18.609	ACTB	18.609	ACTB	20.0521	ACTB	20.0521	ACTB	20.0596	ACTB	19.9684	ACTB	20.1074
hBSO 1 month	Sample 9	ACTB	21.1358	ACTB	21.4271	ACTB	21.3811	ACTB	21.1604	ACTB	21.7136	ACTB	21.2734	ACTB	21.1604	ACTB	23.1474	ACTB	21.5406	ACTB	20.141	ACTB	21.2734	ACTB	21.4271	ACTB	21.3811	ACTB	23.2132	ACTB	22.1003	ACTB	20.9101	ACTB	21.2784	ACTB	19.9855	ACTB	19.9855	ACTB	21.6436	ACTB	21.6436	ACTB	21.3487	ACTB	21.2784	ACTB	20.6613
hBSO 1 month	Sample 10	ACTB	19.7843	ACTB	19.9722	ACTB	20.0885	ACTB	19.8013	ACTB	19.805	ACTB	19.983	ACTB	19.8013	ACTB	21.6642	ACTB	20.3072	ACTB	18.9723	ACTB	19.983	ACTB	19.9722	ACTB	20.0885	ACTB	21.6399	ACTB	20.7218	ACTB	19.7208	ACTB	20.0533	ACTB	18.4645	ACTB	18.4645	ACTB	20.1383	ACTB	20.1383	ACTB	20.2034	ACTB	20.0533	ACTB	19.9921
[truncated: 4 more columns]
