# Supplementary material for: Brainstem Organoids From Human Pluripotent Stem Cells
Source: Front Neurosci. 2020 Jun 26;14:538. doi: 10.3389/fnins.2020.00538 (PMC7332712; doi:10.3389/fnins.2020.00538)
Supplement: Supplementary file 5 [file Table_4.xlsx]

## Sheet: Sheet1
Supplemental Table 4: Mean threshold cycle (Ct) values of 3-month old hBSO from hESCs in quantitative polymerase chain reaction analysis.
Plate1				Plate 2		Plate 3		Plate 4		Plate 5		Plate 6		Plate 7		Plate 8		Plate 9		Plate 10		Plate 11
Sample	Sample number	Gene	Ct Mean	Gene	Ct Mean	Gene	Ct Mean	Gene	Ct Mean	Gene	Ct Mean	Gene	Ct Mean	Gene	Ct Mean	Gene	Ct mean	Gene	Ct Mean	Gene	Ct Mean	Gene	Ct Mean
hESC	Sample 1	SOX2	22.4853	ASCL1	35.1927	SLC3A1	25.5947	OTX2	25.3384	FOXA2	31.6533	NR4A2	32.411	MAP2	26.6046	TH	33.998	GAD67	33.9563	OLIG2	31.4829	MBP	31.8854
hESC	Sample 2	SOX2	22.3948	ASCL1	35.2448	SLC3A1	25.8069	OTX2	25.4403	FOXA2	32.6107	NR4A2	32.5205	MAP2	26.4827	TH	34.8541	GAD67	34.1824	OLIG2	31.492	MBP	31.5556
hESC	Sample 3	SOX2	22.4335	ASCL1	35.702	SLC3A1	26.6272	OTX2	24.8973	FOXA2	30.4527	NR4A2	33.0299	MAP2	26.2483	TH	34.3325	GAD67	33.636	OLIG2	32.7299	MBP	32.5072
hBSO 3 months	Sample 4	SOX2	25.7298	ASCL1	28.8539	SLC3A1	26.358	OTX2	25.0084	FOXA2	31.4871	NR4A2	26.7001	MAP2	21.9883	TH	29.4157	GAD67	28.0964	OLIG2	29.8353	MBP	30.9244
hBSO 3 months	Sample 5	SOX2	24.8641	ASCL1	26.9853	SLC3A1	26.3644	OTX2	23.2284	FOXA2	31.1921	NR4A2	25.9389	MAP2	21.5125	TH	28.3035	GAD67	27.2697	OLIG2	29.6307	MBP	30.5492
hBSO 3 months	Sample 6	SOX2	23.8688	ASCL1	26.0795	SLC3A1	26.6458	OTX2	22.749	FOXA2	33.4122	NR4A2	27.9948	MAP2	21.7003	TH	27.9133	GAD67	26.4786	OLIG2	30.8253	MBP	31.7905
hESC	Sample 1	ACTB	18.2595	ACTB	18.9522	ACTB	18.7467	ACTB	18.8569	ACTB	18.2835	ACTB	18.2649	ACTB	18.6048	ACTB	18.2665	ACTB	18.7184	ACTB	18.5023	ACTB	18.758
hESC	Sample 2	ACTB	18.5273	ACTB	18.9183	ACTB	18.8501	ACTB	18.9276	ACTB	18.6075	ACTB	18.5892	ACTB	18.7718	ACTB	18.6383	ACTB	18.8007	ACTB	18.6284	ACTB	18.8867
hESC	Sample 3	ACTB	18.3688	ACTB	18.7261	ACTB	18.6196	ACTB	18.6584	ACTB	18.5105	ACTB	18.607	ACTB	18.6161	ACTB	18.6543	ACTB	18.6634	ACTB	18.5393	ACTB	18.7529
hBSO 3 months	Sample 4	ACTB	20.7613	ACTB	21.2222	ACTB	21.1242	ACTB	21.1607	ACTB	21.0253	ACTB	21.0404	ACTB	21.0056	ACTB	21.082	ACTB	21.0337	ACTB	20.9927	ACTB	21.0464
hBSO 3 months	Sample 5	ACTB	20.3541	ACTB	20.8958	ACTB	20.7631	ACTB	20.7591	ACTB	20.4649	ACTB	20.5274	ACTB	20.629	ACTB	20.4881	ACTB	20.5933	ACTB	20.4956	ACTB	20.6787
hBSO 3 months	Sample 6	ACTB	19.9516	ACTB	20.5879	ACTB	20.4424	ACTB	20.6047	ACTB	20.0035	ACTB	20.0648	ACTB	20.4034	ACTB	20.1173	ACTB	20.2033	ACTB	19.9082	ACTB	20.225
