# Supplementary material for: Brainstem Organoids From Human Pluripotent Stem Cells
Source: Front Neurosci. 2020 Jun 26;14:538. doi: 10.3389/fnins.2020.00538 (PMC7332712; doi:10.3389/fnins.2020.00538)
Supplement: Supplementary file 10 [file Table_9.xlsx]

## Sheet: Lancaster vs ES
Supplemental Table 9: Differentially expressed genes between hCOs and hESCs in RNA-seq analysis.
Gene_name	log (hCO/hESC)	FDR (hCO/hESC)	A (hCO/hESC)
A1CF	6.83344	0.166628	3.19093
A2M	11.0916	0.00346542	-0.978993
AATF	-7.44305	0.0397716	-0.978993
ABCA8	6.62287	0.107231	-0.978993
ABI3BP	6.44779	0.150972	3.99811
ACKR3	5.21903	0.184199	6.84316
ACOXL	-6.88145	0.108524	3.70853
ACSL5	6.30095	0.142092	-0.978993
ACVRL1	6.53798	0.115406	-0.978993
ADAM12	5.64214	0.137912	6.68275
ADAMTS18	9.58105	0.0179245	4.56474
ADAMTS9	7.20856	0.0409755	7.62642
ADAMTS9-AS2	6.47087	0.121271	-0.978993
ADCYAP1	7.65346	0.0488972	-0.978993
ADGRD1	6.40048	0.09907	4.55941
ADGRF5	6.64334	0.196431	3.09588
ADGRG1	6.17797	0.0862688	7.90759
ADGRG3	5.5104	0.150972	6.52941
ADH4	6.62287	0.107231	-0.978993
AFP	10.7405	0.0029256	10.9518
AGT	9.81552	0.0154191	4.68197
AGTR1	8.33279	0.0526011	3.94061
AHNAK	6.89342	0.0464434	10.5608
AHSG	10.7763	0.00346542	6.74732
AKAP6	6.19094	0.0910324	6.03961
AKR1B10	8.13022	0.0342488	-0.978993
AKR1C2	7.03275	0.146429	3.29059
AKR1D1	7.85114	0.0425703	-0.978993
ALB	7.82451	0.0786574	3.68647
ALDH1A1	6.29017	0.0860802	6.50426
ALPK2	6.18009	0.107537	5.44922
ALX4	9.32964	0.0241757	4.43903
AMBN	6.77899	0.0953564	-0.978993
AMER2	6.62582	0.0775218	5.89447
ANGPT2	6.85114	0.0899255	-0.978993
ANKFN1	6.22151	0.149252	-0.978993
ANKRD1	6.74152	0.181036	3.14497
ANXA1	6.60212	0.0788882	5.66023
ANXA8	8.95712	0.0160683	-0.978993
ANXA8L1	7.732	0.0451827	-0.978993
APOA1	11.6323	0.00259627	7.17532
APOA2	11.6554	0.00425268	5.60189
APOA4	11.3217	0.0029961	-0.978993
APOB	7.36306	0.0334631	9.83078
APOC3	11.8848	0.00259627	-0.978993
APOH	6.90298	0.0862688	-0.978993
APOLD1	6.18475	0.116813	4.45155
AQP1	11.5717	0.0029961	6.56008
ARID5B	5.20936	0.192564	6.54882
ARX	8.3803	0.0198883	5.54933
ASCL1	8.11564	0.0609752	3.83203
ASXL3	5.22491	0.187456	6.38667
ATP10A	-5.74481	0.179774	4.14021
ATP6V0D2	6.55968	0.11461	-0.978993
B3GALT2	6.64334	0.105962	-0.978993
BAHCC1	7.23656	0.0412788	6.56241
BARHL1	7.70304	0.0466061	-0.978993
BARHL2	7.42433	0.0602093	-0.978993
BCO2	6.63314	0.133481	4.09078
BMP5	9.5995	0.0119417	-0.978993
BNC1	6.50911	0.0743963	6.72921
BRINP3	7.30095	0.0624456	-0.978993
C11orf96	5.46628	0.195507	4.82928
C13orf42	-6.67633	0.0898357	5.19093
C1orf61	5.87825	0.116813	5.88326
C1orf94	-7.32019	0.0786574	3.9279
C1QTNF7	6.66352	0.104204	-0.978993
C20orf203	6.44779	0.126888	-0.978993
C5orf66-AS1	6.51596	0.116813	-0.978993
CABP7	7.37623	0.108524	3.46233
CAMK2A	6.1083	0.119682	4.82836
CBLN2	6.72241	0.184014	3.13542
CCDC33	5.95302	0.184199	-0.978993
CCDC68	5.58105	0.189844	4.1497
CD300E	6.44779	0.126888	-0.978993
CD93	8.50482	0.0451827	4.02662
CDC20B	6.72241	0.184014	3.13542
CDH10	5.96391	0.142092	4.34113
CDH12	7.12295	0.075107	-0.978993
CDH19	7.60212	0.0506159	-0.978993
CDH20	7.27495	0.118155	3.41169
CDX2	7.19403	0.0703124	-0.978993
CELF3	6.44241	0.0786091	6.69585
CELF6	7.19403	0.0703124	-0.978993
CHCHD10	-5.79181	0.169778	4.16371
CHL1	8.08231	0.0431737	4.81536
CHORDC1	-5.79181	0.182813	4.74867
CHRM2	6.07855	0.163915	-0.978993
CLIP4	5.95302	0.145281	4.33569
CNGB1	6.88591	0.0879563	-0.978993
CNMD	-6.3675	0.0781277	7.45155
CNTFR	6.19576	0.0865244	6.87209
CNTN5	8.55429	0.0243314	-0.978993
CNTN6	7.36396	0.0609752	-0.978993
CNTNAP2	5.88591	0.1924	-0.978993
CNTNAP4	7.30095	0.0786574	4.42468
COL15A1	8.88948	0.013173	6.80391
COL22A1	5.84611	0.142092	5.50462
COL3A1	15.685	0.000112677	9.20167
COL6A3	8.87651	0.0123117	7.6719
COL6A6	6.68342	0.190152	3.11592
COPG2IT1	6.98544	0.0497197	6.43686
CPED1	9.59162	0.0119417	-0.978993
CR2	-6.79181	0.116156	3.66371
CRB1	7.53798	0.0953564	3.5432
CREB5	7.30095	0.0624456	-0.978993
CRHBP	7.64334	0.0493468	-0.978993
CSF3R	6.95302	0.0836204	-0.978993
CSNK2B	-5.36439	0.197184	-0.978993
CUBN	7.02497	0.0953564	4.2867
CUZD1	-5.74163	0.188714	4.72358
CXCL5	-5.66628	0.174222	5.10094
CXCL6	-5.69623	0.187456	4.11592
CXorf36	6.42433	0.129274	-0.978993
CYP26B1	6.74152	0.181036	3.14497
CYSLTR2	7.00139	0.0808295	-0.978993
D21S2088E	-5.54167	0.149252	6.6236
DACH1	7.30951	0.0445733	6.01393
DCC	6.05074	0.102866	6.38454
DCLK2	6.69816	0.0775218	5.12329
DCN	13.0623	0.0014827	-0.978993
DCT	7.49359	0.09907	3.52101
DCX	5.35393	0.154824	10.021
DDC	6.95302	0.0836204	-0.978993
DDR2	8.06724	0.0432056	4.80783
DKK2	5.60401	0.149252	6.03565
DLK1	8.53011	0.0140644	8.03927
DLX1	7.50482	0.0562575	-0.978993
DLX5	5.91986	0.187456	-0.978993
DMRT3	7.26178	0.0808295	4.4051
DMRTA2	9.58899	0.0119417	-0.978993
DNAH2	7.07855	0.0910324	4.31349
DNM3OS	9.34534	0.0131101	-0.978993
DNMT3B	-5.49615	0.141968	11.5743
DPF3	6.37623	0.133245	-0.978993
DRC1	6.66352	0.192642	3.10597
DRGX	6.88591	0.0879563	-0.978993
DSCAML1	6.58105	0.112795	-0.978993
EBF1	8.31377	0.0355586	4.9311
EBF2	9.37011	0.0129309	-0.978993
EBF3	8.49171	0.0178993	5.60503
EBF4	5.23236	0.19799	5.71232
EGFLAM	7.05583	0.0931456	4.30213
ELAVL3	5.3739	0.157048	7.85348
ELAVL4	10.4536	0.0106969	5.00101
EMX2	10.4752	0.00540678	-0.978993
EMX2OS	9.73676	0.0106969	-0.978993
ENPP2	5.32758	0.166822	6.96156
EOMES	8.38841	0.0499019	3.96842
EPHA3	7.45681	0.0351249	6.67254
EPHA5	7.40448	0.0451827	5.06142
ERBB4	8.55699	0.0309936	5.0527
ERVMER34-1	-5.35106	0.170996	6.85022
ESAM	6.70304	0.186678	3.12573
ESM1	7.1083	0.0762785	-0.978993
ESRG	-6.50997	0.0614679	10.6102
EXD3	6.13745	0.196431	3.84294
F2	6.79737	0.169778	3.1729
F2RL2	7.38841	0.107384	3.46842
FABP1	9.93446	0.00992896	-0.978993
FAM107A	7.01192	0.0610159	4.86513
FAM198B	9.1083	0.0151859	-0.978993
FAM24B-CUZD1	-5.74163	0.188714	4.72358
FAP	7.07855	0.0775234	-0.978993
FETUB	6.64334	0.105962	-0.978993
FEZF2	9.57041	0.0119417	-0.978993
FGA	11.7651	0.00259627	-0.978993
FGB	12.3636	0.0023217	-0.978993
FGF9	6.90298	0.0862688	-0.978993
FGG	11.3724	0.0029961	-0.978993
FIBIN	8.32648	0.0309848	-0.978993
FILIP1L	8.04049	0.0641173	3.79445
FLRT2	6.85114	0.0899255	-0.978993
FLRT3	6.25381	0.0844956	7.22305
FMO1	7.54887	0.0943719	3.54865
FMOD	8.3495	0.0206434	5.53392
FNDC7	-5.84626	0.137912	-0.978993
FOXC1	8.56505	0.0241757	-0.978993
FOXF1	7.76972	0.0440905	-0.978993
FOXG1	9.40048	0.0148258	5.47445
FOXP2	6.90298	0.0669568	4.81066
FRZB	5.74667	0.115406	9.33405
FUT5	6.53798	0.115406	-0.978993
FYB2	7.57041	0.092856	3.55941
FZD10-AS1	6.79737	0.092856	-0.978993
G0S2	7.41444	0.0421052	6.06639
GABRB1	6.33908	0.164908	3.94375
GAL	-5.52271	0.15281	6.48859
GALNT5	6.74152	0.181036	3.14497
GATA2	7.31377	0.115344	3.4311
GATA3	7.48228	0.0996647	3.51535
GATA5	8.43611	0.0273831	-0.978993
GATA6	10.0501	0.00852661	-0.978993
GATA6-AS1	8.53251	0.0246495	-0.978993
GBP2	6.13745	0.157568	-0.978993
GBP4	6.01715	0.175283	-0.978993
GDF10	6.32648	0.166628	3.93745
GDF7	10.7332	0.00946504	5.14081
GGT5	6.55968	0.11461	-0.978993
GJB1	6.40048	0.131371	-0.978993
GLB1L3	-8.27128	0.0370694	4.40344
GLIS3	7.07855	0.141048	3.31349
GNRH2	5.66352	0.178427	4.19093
GPM6A	6.09986	0.0887308	7.95343
GPR176	-6.17086	0.0836204	8.93819
GREB1L	7.72241	0.0355586	5.22038
GREM2	7.55429	0.0624456	4.55135
GRIA2	9.8773	0.0104769	-0.978993
GRIN3A	6.98544	0.150116	3.26693
GRM7	5.91986	0.187456	-0.978993
GSTA1	9.08605	0.0153568	-0.978993
GSTA2	9.14105	0.0148258	-0.978993
GUCY1A1	9.01715	0.0155075	-0.978993
H19	9.0935	0.0119417	7.32096
HAND1	11.5394	0.0029256	-0.978993
HAND2	10.2027	0.00698269	-0.978993
HAND2-AS1	9.57041	0.0119417	-0.978993
HAPLN1	5.99109	0.101918	6.85722
HBE1	7.76038	0.0441565	-0.978993
HBG2	6.68342	0.102734	-0.978993
HES4	7.59373	0.0369237	5.893
HGF	7.61771	0.0609752	4.58307
HHLA1	-5.38905	0.1924	-0.978993
HLA-A	-5.88145	0.133245	-0.978993
HMGCLL1	7.90298	0.0406057	-0.978993
HMGCS2	5.88591	0.1924	-0.978993
HNF4A	7.35157	0.0609752	-0.978993
HOPX	7.01715	0.0806285	-0.978993
HOXA10	6.30095	0.142092	-0.978993
HOXA10-HOXA9	6.81552	0.091445	-0.978993
HOXA11	6.16602	0.154824	-0.978993
HOXA13	6.04818	0.166822	-0.978993
HOXA9	6.90298	0.0862688	-0.978993
HOXB2	8.54887	0.0243738	-0.978993
HOXB3	9.35468	0.0130158	-0.978993
HOXB4	8.18708	0.0324515	-0.978993
HOXB5	6.91986	0.0855754	-0.978993
HOXB6	7.37623	0.0609752	-0.978993
HOXB7	6.53798	0.115406	-0.978993
HOXB8	7.732	0.0451827	-0.978993
HOXB9	7.52701	0.0551486	-0.978993
HOXC4	7.58105	0.0919052	3.56474
HOXC5	6.62287	0.107231	-0.978993
HOXC6	7.86863	0.0418624	-0.978993
HOXC8	8.24848	0.0314272	-0.978993
HOXD4	6.44779	0.126888	-0.978993
HPD	6.1083	0.161106	-0.978993
HSD17B2	6.24848	0.147215	-0.978993
HSF4	6.24848	0.147215	-0.978993
HSPB7	6.16602	0.154824	-0.978993
HYMAI	6.32648	0.140827	-0.978993
ID4	5.87975	0.103047	9.28394
IDO1	-7.35607	0.0546967	5.5308
IFI44L	7.01715	0.0806285	-0.978993
IGF1	6.79737	0.092856	-0.978993
IGF2	11.0243	0.00259627	10.1443
IGF2-AS	7.00139	0.0808295	-0.978993
IGFBP3	6.07022	0.0894811	9.05725
IGFBP5	7.37195	0.0355586	7.78211
IHH	6.35157	0.134698	-0.978993
INPP4B	5.74909	0.154824	4.97069
INS-IGF2	11.0241	0.00259627	10.1442
INSM1	8.93653	0.0328469	4.24248
IPO4	-5.59387	0.163915	-0.978993
ISL1	8.47087	0.026303	-0.978993
ISL2	7.28801	0.062919	-0.978993
ISLR2	7.47943	0.0419564	5.51393
ITGA8	10.455	0.0106969	5.00173
ITIH2	9.10462	0.0151859	-0.978993
JAKMIP2-AS1	-8.52322	0.0314272	4.52941
KANK4	5.9448	0.112922	6.33157
KCNJ9	7.12295	0.075107	-0.978993
KCTD16	7.20095	0.0836204	4.37469
KIAA0895	5.9054	0.134698	5.53427
KIAA1755	6.24848	0.147215	-0.978993
KLB	6.8773	0.107384	4.21286
KLHDC1	6.22151	0.149252	-0.978993
KLHDC7A	-7.41129	0.0514942	5.55841
KLKB1	-7.44892	0.0712073	3.99226
KLRG2	-5.81384	0.144756	5.49665
KRT16	6.01715	0.175283	-0.978993
KRT24	6.76038	0.0960961	-0.978993
L1TD1	-5.23023	0.169333	12.025
LCK	-8.65616	0.0167715	5.59588
LEF1	7.12941	0.0440905	6.50884
LHX2	7.79432	0.0342751	5.25634
LHX5	7.05838	0.0609752	4.88836
LHX5-AS1	7.77899	0.0440905	-0.978993
LHX9	8.04049	0.0359105	-0.978993
LINC00261	6.83344	0.166628	3.19093
LINC00428	-7.72765	0.0300393	6.93898
LINC00461	11.2334	0.00540678	5.3909
LINC00643	6.13745	0.157568	-0.978993
LINC00678	-7.6097	0.0314272	7.39458
LINC00982	7.71276	0.0836204	3.63059
LINC01158	7.44779	0.0590997	-0.978993
LINC01266	6.04818	0.166822	-0.978993
LINC01551	9.54616	0.0121331	-0.978993
LINC01833	5.91986	0.187456	-0.978993
LINC02381	9.44779	0.0124071	-0.978993
LIPC	6.62287	0.107231	-0.978993
LIX1	10.8665	0.00430329	-0.978993
LMX1A	7.89447	0.0411713	-0.978993
LNCPRESS2	-6.88579	0.0557201	7.03262
LOC100126447	-6.67383	0.0800397	5.60472
LOC100130370	6.30095	0.142092	-0.978993
LOC101928499	-6.79181	0.116156	3.66371
LOC102723512	6.68342	0.102734	-0.978993
LOC102725048	-6.13577	0.105962	-0.978993
LOC105369212	6.62287	0.107231	-0.978993
LOC105369436	-7.31376	0.0400856	6.73204
LOC105370482	-8.68632	0.0147192	-0.978993
LOC105371455	7.0935	0.0771174	-0.978993
LOC105372426	5.60212	0.169778	5.16023
LOC105373409	-5.38088	0.187456	5.5432
LOC105376569	-6.31376	0.091445	-0.978993
LOC105377647	6.40048	0.131371	-0.978993
LOC105378853	6.68342	0.102734	-0.978993
LOC107986058	7.70304	0.0466061	-0.978993
LOC107987188	9.12659	0.029548	4.3375
LOC109864269	-6.0556	0.0910324	9.12849
LOC112268113	6.40048	0.157048	3.97445
LOC642366	7.55968	0.093797	3.55405
LOC644285	6.70304	0.0997546	-0.978993
LOC653513	6.30095	0.142092	-0.978993
LOXL4	5.91986	0.187456	-0.978993
LRP1B	7.44779	0.0590997	-0.978993
LRP2	6.15037	0.0910324	7.17133
LRRC19	5.91986	0.187456	-0.978993
LRRC7	6.62287	0.107231	-0.978993
LRRN4	5.29665	0.189416	6.0075
LRRTM2	7.732	0.0451827	-0.978993
LUM	13.2003	0.0014827	-0.978993
LURAP1L	5.66352	0.178427	4.19093
LYST	6.46322	0.093797	4.59078
MAB21L1	9.03662	0.0155075	-0.978993
MAB21L2	9.6203	0.0116759	-0.978993
MAPT	5.74693	0.150972	5.45503
MBNL2	5.17935	0.19947	6.61182
MDGA1	6.732	0.121512	4.14021
MECOM	5.81552	0.149252	5.0039
MEIS1	9.63314	0.017296	4.59078
MEIS2	10.8859	0.00425268	-0.978993
MEP1A	8.69326	0.0203608	-0.978993
METTL24	5.53798	0.198628	4.12817
MFAP4	5.63779	0.134698	7.6375
MGP	7.1518	0.0723947	-0.978993
MIR100HG	7.6735	0.0354178	5.93289
MIR124-2HG	7.1923	0.0479657	6.37036
MIR302C	-5.75434	0.147215	-0.978993
MIR3606	11.8256	0.00259627	-0.978993
MIR5004	-5.7732	0.145473	-0.978993
MIR9-3HG	6.71759	0.0763922	5.13301
MIR99AHG	7.04818	0.0789159	-0.978993
MLC1	6.74152	0.0979343	-0.978993
MMP1	6.58105	0.112795	-0.978993
MMP25	-7.2546	0.044968	-0.978993
MMRN1	9.49077	0.0123117	-0.978993
MPO	8.17307	0.0609752	3.86075
MPPED1	5.47414	0.187456	5.31864
MSX1	6.94205	0.0641764	4.8302
MSX2	7.2044	0.0514482	5.37641
MTTP	5.7169	0.13879	6.44002
MVP	6.96003	0.0606425	6.06158
MYL4	7.30095	0.0624456	-0.978993
MYO16	7.12295	0.135923	3.33569
MYT1L	7.47087	0.0586993	-0.978993
NANOG	-6.12968	0.091445	6.91761
NANOGP1	-6.60444	0.0762785	-0.978993
NANOGP8	-5.53763	0.154824	6.35854
NDRG1	5.34991	0.163876	7.35606
NDST3	6.28801	0.169778	3.91821
NDST4	8.13745	0.0609752	3.84294
NETO1	-6.09137	0.14598	4.89845
NEUROD1	9.05583	0.0154191	-0.978993
NEUROD4	7.49359	0.0569964	-0.978993
NEUROD6	6.64334	0.105962	-0.978993
NEUROG1	7.12295	0.075107	-0.978993
NEUROG2	8.63314	0.0220814	-0.978993
NFE2L3	-5.21833	0.174222	9.14376
NHLH1	7.20784	0.0497197	5.70006
NPNT	8.52921	0.0148258	7.94571
NPR3	10.6735	0.0101177	5.11096
NR2E1	8.71759	0.0198146	-0.978993
NR2F1	12.305	0.00235803	-0.978993
NR2F1-AS1	6.23955	0.112836	4.47895
NR2F2	12.207	0.00249287	-0.978993
NR2F2-AS1	6.30095	0.142092	-0.978993
NRN1	9.19749	0.0144407	-0.978993
NSG2	7.88836	0.0298529	6.52575
NTRK2	10.0963	0.0104769	5.82236
OLR1	7.84232	0.0427565	-0.978993
OSR1	6.31802	0.105125	4.51818
P2RX3	9.94686	0.014692	4.74764
PAPPA	7.16743	0.043713	6.67985
PAPPA2	6.34742	0.0831384	6.53288
PAX3	6.23056	0.113852	4.47445
PAX6	11.3122	0.0029961	-0.978993
PCK1	6.86863	0.0888634	-0.978993
PDE1A	6.43219	0.0960007	4.57527
PDZRN4	6.77899	0.0953564	-0.978993
PEAR1	5.25333	0.196421	5.86031
PECAM1	8.83344	0.0355586	4.19093
PF4	6.14703	0.121512	4.43269
PGAM1P5	-5.5508	0.166822	-0.978993
PGM5	9.18708	0.0278168	4.36775
PHACTR3	5.82987	0.148353	5.01108
PIRT	5.91986	0.187456	-0.978993
PITX1	10.1783	0.00719147	-0.978993
PITX2	8.50295	0.0178993	5.61065
PKHD1L1	7.83344	0.033137	5.27589
PLA2G12B	5.95302	0.184199	-0.978993
PLAGL1	5.74352	0.128423	6.8939
PLCL1	6.54887	0.142092	4.04865
PLEK	7.03275	0.0799342	-0.978993
PLG	10.6357	0.0048856	-0.978993
PLVAP	6.70304	0.126779	4.12573
PLXNA2	5.43868	0.150972	7.8511
PNPLA5	-6.51764	0.147215	3.52662
POLR3G	-6.49464	0.063391	9.15898
POSTN	8.6468	0.0126516	9.55704
POU3F2	5.22378	0.185692	6.97106
POU3F3	8.63058	0.0155075	6.0895
POU4F1	7.40648	0.0437453	5.47745
POU5F1	-5.99826	0.102096	6.8519
POU5F1B	-6.142	0.093188	7.14616
POU5F1P3	-6.35607	0.0787101	7.0308
POU5F1P4	-6.62015	0.0888634	4.57788
PPBP	7.39446	0.0737065	4.47144
PRDM12	7.1518	0.0723947	-0.978993
PRDM14	-6.15586	0.0872959	7.51566
PRDM16	7.39807	0.0431737	5.79518
PRDM6	6.72241	0.122647	4.13542
PRPH	6.63882	0.0635044	6.26354
PRRX1	9.45359	0.0124016	-0.978993
PSD2	5.96608	0.133245	5.07918
PTH1R	7.73676	0.0579639	4.64259
PTPRH	5.88591	0.150972	4.30213
PUS7L	6.13745	0.157568	-0.978993
RAB27B	7.18009	0.130313	3.36426
RAI1	5.17627	0.187456	7.82178
RALYL	6.40048	0.131371	-0.978993
RARB	8.11564	0.0609752	3.83203
RBP2	8.45359	0.0471764	4.00101
RBP4	8.93488	0.0130114	6.56358
RELN	9.46686	0.00784576	7.82957
REN	9.04818	0.0154191	-0.978993
RFX4	8.69816	0.0400856	4.12329
RGS13	6.35157	0.134698	-0.978993
RGS4	7.9125	0.0286034	6.73046
RHOJ	6.41245	0.155516	3.98044
RIMBP2	5.95848	0.131661	5.33841
RNASE1	6.04818	0.166822	-0.978993
RPS4Y1	6.90298	0.0862688	-0.978993
RSPO1	9.37317	0.0227223	4.4608
RSPO2	6.56978	0.0644243	7.14656
RSPO3	8.44196	0.0322702	4.99519
RTN4RL1	7.8773	0.0416512	-0.978993
RXRG	7.80647	0.0437453	-0.978993
S100A14	5.27341	0.182087	6.49838
SAMD11	7.80647	0.0437453	-0.978993
SAMD5	6.88591	0.0681094	4.80213
SCG2	5.65458	0.142092	5.77143
SCN3A	6.50482	0.0836204	5.61158
SCRG1	6.93653	0.0843903	-0.978993
SEMA3C	6.54616	0.0806285	6.04729
SEMG1	-5.46061	0.184199	-0.978993
SERPINA1	10.3562	0.00562729	-0.978993
SERPINC1	6.58105	0.112795	-0.978993
SERPIND1	6.60212	0.108631	-0.978993
SERPINE3	6.27495	0.108631	4.49665
SEZ6L	6.22151	0.102455	5.69232
SGCG	6.19403	0.150972	-0.978993
SHOX2	6.13745	0.122647	4.4279
SI	6.16602	0.154824	-0.978993
SIX1	5.86863	0.142092	5.29349
SIX3	6.65346	0.131948	4.10094
SKOR2	6.1083	0.161106	-0.978993
SLC16A3	5.51102	0.14598	7.69965
SLC17A6	6.13482	0.0957847	6.30105
SLC22A7	7.82451	0.0431737	-0.978993
SLC2A5	6.96932	0.0836204	-0.978993
SLC30A4	7.69326	0.0852298	3.62084
SLC38A4	-5.9364	0.116813	6.40593
SLC39A5	7.54887	0.0943719	3.54865
SLC40A1	10.0386	0.0106969	5.79349
SLC5A12	6.1001	0.0941114	6.99419
SLC7A4	5.98544	0.179774	-0.978993
SLCO2B1	8.03275	0.0364351	-0.978993
SLIT1	5.81251	0.115406	7.26543
SLIT3	6.41676	0.0714185	8.53718
SLITRK6	7.1518	0.0579639	4.93508
SLPI	7.0935	0.0771174	-0.978993
SMLR1	5.91986	0.187456	-0.978993
SMPDL3B	-8.28284	0.0246557	5.40922
SNAI2	6.50641	0.0749046	6.83477
SOX1	7.25115	0.0477021	5.72171
SOX17	6.49359	0.118476	-0.978993
SOX6	9.73438	0.0123117	5.6414
SST	6.811	0.0701226	5.17971
ST18	9.02107	0.0314272	4.28475
STMN2	8.55597	0.0140644	8.0522
STMN4	8.62802	0.0155075	6.08822
SULT1E1	6.64334	0.105962	-0.978993
SULT2A1	6.53798	0.115406	-0.978993
SVEP1	5.1278	0.197112	7.245
TAL1	6.19403	0.150972	-0.978993
TBR1	9.72961	0.0159734	4.63901
TBX2	8.60733	0.022861	-0.978993
TBX20	9.03662	0.0314272	4.29252
TBX3	7.90581	0.0314272	5.31208
TBX4	7.69326	0.0470691	-0.978993
TCF21	6.03791	0.134698	4.37813
TCIM	8.74626	0.0376697	4.14734
TDGF1	-6.29036	0.0773157	9.99795
TDGF1P3	-5.69058	0.136607	6.92045
TECRL	6.44779	0.126888	-0.978993
TERT	-5.683	0.149252	5.69426
TF	8.90722	0.0340266	4.22782
TFAP2A	9.38841	0.0127948	-0.978993
TFAP2B	9.24178	0.0140644	-0.978993
TFEC	5.91986	0.187456	-0.978993
TGFB2	5.28367	0.192642	6.32294
TH	6.35157	0.134698	-0.978993
THBD	5.70304	0.140827	6.43309
THCAT155	7.28801	0.116156	3.41821
TKTL1	6.62287	0.107231	-0.978993
TLX3	7.20784	0.127337	3.37813
TMEM132C	5.6735	0.133293	6.61096
TMEM132E	5.43845	0.199817	4.81536
TMEM88	5.96608	0.109189	6.07918
TNFRSF11A	-5.61911	0.163915	5.39929
TNFRSF19	6.1083	0.116156	5.15029
TNFRSF8	-5.54203	0.17504	5.36075
TNFSF11	-6.51764	0.147215	3.52662
TNNI1	6.6501	0.0820772	4.68422
TNRC18	5.81218	0.109671	8.43519
TPPP3	5.44779	0.19304	5.08307
TRH	9.98745	0.00930496	-0.978993
TRIM67	8.42433	0.0484695	3.98638
TSHZ1	8.05329	0.0286305	5.38582
TSHZ2	7.45938	0.0437453	5.08886
TTR	12.9433	0.00249287	6.24584
TUBB1	5.98544	0.179774	-0.978993
TWIST1	6.78269	0.0694735	5.48748
TXNIP	6.42081	0.0679531	10.2607
UBA7	7.00139	0.0808295	-0.978993
UGT2B11	7.30095	0.0624456	-0.978993
UNC13C	6.1083	0.161106	-0.978993
UNCX	7.88591	0.075107	3.71717
USP44	-5.56	0.136607	9.0478
USP9Y	5.95302	0.184199	-0.978993
VCAM1	8.35778	0.0298091	-0.978993
VRTN	-6.5644	0.0613189	8.35736
VTN	10.7224	0.0048856	-0.978993
WISP1	8.52701	0.0246495	-0.978993
WLS	6.60428	0.0609752	7.93433
WNT1	6.90298	0.0862688	-0.978993
WNT11	7.48228	0.0996647	3.51535
WNT4	5.88591	0.150972	4.30213
WNT7A	7.27495	0.118155	3.41169
WNT7B	9.34065	0.0153568	5.44454
WRBP1	-6.16462	0.104204	-0.978993
YPEL4	5.63655	0.181795	4.17745
ZBTB16	7.48	0.0407714	5.83614
ZBTB20	6.43219	0.088474	5.57527
ZEB1	6.70142	0.0602093	7.70988
ZEB2	8.22378	0.0208844	6.47106
ZFHX3	6.52786	0.0727393	6.73858
ZFHX4	5.67927	0.126683	8.04011
ZFHX4-AS1	7.18009	0.0711629	-0.978993
ZFPM2	6.97741	0.0609752	5.26291
ZIC1	7.7635	0.0281199	6.82588
ZIC4	8.2283	0.0314272	-0.978993
ZNF467	6.6735	0.0786574	5.11096
ZNF503	10.5366	0.00539213	-0.978993
ZNF503-AS2	6.19403	0.150972	-0.978993
ZNF536	8.05583	0.0355586	-0.978993
ZNF540	5.6501	0.179774	4.18422
ZNF804A	6.70304	0.186678	3.12573
ZSCAN10	-5.63488	0.131371	8.75767
ZYX	-6.58322	0.0910324	4.55941
