# Supplementary material for: Brainstem Organoids From Human Pluripotent Stem Cells
Source: Front Neurosci. 2020 Jun 26;14:538. doi: 10.3389/fnins.2020.00538 (PMC7332712; doi:10.3389/fnins.2020.00538)
Supplement: Supplementary file 11 [file Table_10.xlsx]

## Sheet: Sheet1
Supplemental Table 10: Differentially expressed genes selective in hBSOs in RNA-seq analysis.
Gene symbol	log (hBSO/hESC)	FDR (hBSO/hESC)	A (hBSO/hESC)	log (hBSO/hCO)	FDR (hBSO/hCO)	A (hBSO/hCO)
FLT1	-10.9075	0.0673138	6.36934	-8.80545	6.65659e-09	5.1187
AP1M2	-10.8831	0.0673138	5.35717	-7.04742	4.18941e-05	3.23968
APELA	-10.0351	0.09873	4.93317	-6.39292	0.000304948	2.91243
TRIML2	-9.72864	0.0792873	-0.997377	-5.72549	0.00235433	-0.965013
LNCPRESS1	-9.26152	0.0921223	-0.997377	-4.80796	0.0301628	-0.965013
LAD1	-9.13695	0.101685	-0.997377	-5.59223	0.00371546	-0.965013
ZFP42	-8.90726	0.0975179	7.53915	-4.59223	0.000668085	5.59705
CRYBG1	-8.67589	0.135342	5.25354	-3.72549	0.119422	2.57872
VSNL1	-8.27734	0.135526	6.3762	-3.44539	0.0825125	3.76059
NKX1-2	-7.95213	0.167569	5.89166	-3.22299	0.17707	3.32747
PODXL	-7.81561	0.13957	11.2243	-6.70578	8.60106e-08	10.4697
CDCP1	-7.78385	0.194563	5.39248	-6.04175	6.98444e-05	4.32181
LIN28A	-7.70558	0.150065	11.0993	-3.36781	0.0108671	8.73079
MAP1LC3C	7.24628	0.195777	7.80025	5.58436	8.51305e-06	8.43159
CDK15	7.4184	0.194954	-0.997377	4.14707	0.00420335	5.23489
CFAP54	7.4184	0.194954	-0.997377	3.02731	0.0480236	5.86766
SV2C	7.41947	0.189174	6.60674	4.78823	0.000540795	5.55547
GDF5	7.4553	0.191867	-0.997377	4.6694	0.00164999	5.01063
ASIC4	7.50542	0.189174	-0.997377	2.87152	0.0720315	5.95969
LINC02154	7.50542	0.189174	-0.997377	6.04145	0.000131363	4.37473
LOC107986523	7.51943	0.189174	-0.997377	7.05546	3.12051e-06	-0.965013
OTX2-AS1	7.6073	0.179536	-0.997377	3.6839	0.0104143	5.65538
LOC440982	7.61385	0.179027	-0.997377	3.34252	0.0234756	5.83262
MUSK	7.62684	0.177854	-0.997377	3.25598	0.0277394	5.88888
CDH18	7.64772	0.181855	5.91351	4.77055	0.000206806	7.1316
LOC101928817	7.67769	0.170814	-0.997377	4.89179	0.000805425	5.12183
LOC105379041	7.69013	0.170814	-0.997377	7.22616	3.55034e-05	3.96708
LOC112268449	7.69631	0.170059	-0.997377	3.64737	0.0102253	5.76265
OC90	7.70859	0.167761	-0.997377	7.24461	1.6292e-06	-0.965013
ASPA	7.73283	0.165461	-0.997377	6.58114	2.06377e-05	-0.965013
TSHR	7.76846	0.16488	-0.997377	4.71952	0.000919171	5.29873
CFI	7.83717	0.15959	-0.997377	2.48127	0.160277	6.45262
MYH7	7.86486	0.156714	-0.997377	2.54291	0.138394	6.48344
LOC105370767	7.92398	0.15142	-0.997377	4.87504	0.000565791	5.37648
EDAR	7.92923	0.151138	-0.997377	4.88029	0.000556773	5.37911
CAPSL	7.94489	0.149949	-0.997377	5.89595	6.51017e-05	4.88694
CLUL1	7.99336	0.179136	5.08633	3.47311	0.0101477	7.09056
CAPN3	8.01824	0.177354	5.09877	3.57059	0.0072189	7.69389
CFAP47	8.04511	0.139873	-0.997377	3.02939	0.0510232	5.95616
GPNMB	8.07897	0.13195	7.82958	6.615	1.90335e-07	8.36194
VWA3B	8.09741	0.135526	-0.997377	6.04847	4.35812e-05	4.9632
PDE7B	8.11135	0.135342	-0.997377	2.64737	0.0969606	6.67769
RPH3A	8.11135	0.135342	-0.997377	3.0958	0.0343988	6.42546
CFAP61	8.12515	0.135342	-0.997377	4.59079	0.000713669	5.97132
SCARA5	8.13428	0.16488	5.15679	5.21088	7.50595e-05	6.41887
PALMD	8.16579	0.13323	-0.997377	3.11686	0.0310524	6.49739
CFAP206	8.17467	0.132226	-0.997377	2.90334	0.05212	6.61303
LOC441204	8.18789	0.13195	-0.997377	2.50765	0.129641	6.92975
FAM81B	8.20098	0.131939	-0.997377	4.34382	0.0015623	5.84784
PTPRC	8.20532	0.131939	-0.997377	6.74135	1.25264e-05	4.72468
LOC105379506	8.22682	0.131939	-0.997377	7.76285	2.13671e-07	-0.965013
PTGDS	8.24801	0.131591	7.38358	4.88787	8.25523e-05	8.86403
MS4A6A	8.28127	0.129329	-0.997377	5.8173	4.35812e-05	5.26265
C11orf88	8.32579	0.127657	-0.997377	5.53989	9.15001e-05	5.44587
WNT3A	8.38819	0.124591	-0.997377	2.83675	0.0611637	6.85984
ARMC3	8.43327	0.124591	-0.997377	4.79937	0.000443828	5.92361
LOC101927120	8.44065	0.124591	-0.997377	3.58436	0.00982094	6.5385
SLC16A6	8.46619	0.179027	4.32275	3.00221	0.0389184	6.85511
ENKUR	8.4734	0.178844	4.32635	2.75047	0.0721107	6.89916
PRSS56	8.51943	0.119819	-0.997377	3.66314	0.00787182	6.57789
SLC45A2	8.52638	0.119069	-0.997377	8.06241	8.11943e-08	-0.965013
CFAP52	8.54019	0.119069	-0.997377	4.26886	0.00144378	6.29579
DIO3	8.54362	0.170814	4.36146	2.40722	0.159808	7.23004
TEKT1	8.57414	0.118356	-0.997377	4.30281	0.00128768	6.31276
ABCB5	8.59082	0.118356	-0.997377	8.12684	6.2745e-08	-0.965013
WNT10B	8.83717	0.108317	-0.997377	3.16718	0.0219443	7.52255
MAP3K19	8.87851	0.106585	-0.997377	6.82958	2.08634e-06	5.35375
LINC00473	8.9187	0.105094	-0.997377	5.64737	3.44011e-05	5.98504
MEOX1	8.98076	0.100837	-0.997377	4.65284	0.000249288	7.43531
EMP1	8.9855	0.101685	7.5824	5.82109	2.79904e-06	8.96499
CNPY1	9.02807	0.0975179	-0.997377	4.24217	0.00109641	6.79701
LOC105374972	9.04269	0.0967349	-0.997377	8.57872	1.16919e-08	-0.965013
LMX1B	9.04511	0.115696	5.61221	3.24129	0.0163482	8.3145
CRYAB	9.18679	0.108317	5.68305	3.57307	0.00648297	8.29028
CCNO	9.21611	0.0861438	-0.997377	5.34154	5.95303e-05	6.3467
EFCAB1	9.21826	0.0861438	-0.997377	3.72366	0.00494323	7.30329
FAM216B	9.27509	0.0829691	-0.997377	5.64119	2.86174e-05	6.34452
SPAG6	9.2864	0.10511	5.73285	4.46487	0.000421993	7.94399
SLC4A5	9.33789	0.0816742	8.08053	4.81598	9.66061e-05	9.44849
CFAP126	9.34164	0.0816742	-0.997377	3.97078	0.00224649	7.24628
LGI1	9.41466	0.118356	4.79698	2.97823	0.0409209	7.09104
KCNJ13	9.5691	0.0791334	-0.997377	4.62364	0.000326473	7.12525
EN1	9.64133	0.0757226	-0.997377	5.85542	9.61847e-06	6.60364
SCGN	9.76111	0.0695673	-0.997377	5.8377	8.38236e-06	6.73229
RPE65	10.0727	0.0673138	-0.997377	7.28678	1.4239e-07	6.31932
RTL1	10.2129	0.0673138	-0.997377	4.99402	7.97234e-05	7.6059
EN2	10.9061	0.0673138	5.5427	5.08457	5.35264e-05	8.25384
TYR	11.8153	0.0599166	-0.997377	10.3514	1.81498e-11	6.52968
LOC105374794	12.0801	0.0579051	-0.997377	11.6161	1.976e-12	6.16206
MLANA	12.529	0.0368526	-0.997377	9.06501	7.26942e-11	7.88651
TYRP1	13.715	0.0297291	6.94714	7.22286	1.29102e-08	9.96543
