# Supplementary material for: Brainstem Organoids From Human Pluripotent Stem Cells
Source: Front Neurosci. 2020 Jun 26;14:538. doi: 10.3389/fnins.2020.00538 (PMC7332712; doi:10.3389/fnins.2020.00538)
Supplement: Supplementary file 12 [file Table_11.xlsx]

## Sheet: Sheet1
Supplemental Table 11: Differentially expressed genes selective in hCOs in RNA-seq analysis.
Gene symbol	log (hCO/hESC)	FDR (hCO/hESC)	A (hCO/hESC)	log (hCO/hBSO)	FDR (hCO/hBSO)	A (hCO/hBSO)
LOC101928499	-6.79181	0.116156	3.66371	-5.77136	0.00326969	3.23968
ZYX	-6.58322	0.0910324	4.55941	-4.62876	0.0114022	3.66838
HLA-A	-5.88145	0.133245	-0.978993	-2.2744	0.187979	9.85315
CHCHD10	-5.79181	0.169778	4.16371	-5.65659	0.000492959	4.1823
ATP10A	-5.74481	0.179774	4.14021	-5.69289	0.000424428	4.20045
TNFRSF11A	-5.61911	0.163915	5.39929	-5.11016	0.000413804	4.90908
IPO4	-5.59387	0.163915	-0.978993	-4.71952	0.00700165	-0.965013
GAL	-5.52271	0.15281	6.48859	-3.3288	0.0284842	5.47784
NFE2L3	-5.21833	0.174222	9.14376	-2.75874	0.0641522	8.00016
SVEP1	5.1278	0.197112	7.245	7.17913	1.11915e-07	6.30554
ACKR3	5.21903	0.184199	6.84316	2.31759	0.178119	8.38256
PEAR1	5.25333	0.196421	5.86031	3.15676	0.0230907	6.99479
S100A14	5.27341	0.182087	6.49838	8.50531	1.93124e-08	4.96863
LRRN4	5.29665	0.189416	6.0075	9.06848	1.8924e-08	4.25021
MPPED1	5.47414	0.187456	5.31864	2.99967	0.0393722	6.64207
CCDC68	5.58105	0.189844	4.1497	3.06253	0.0495097	5.49516
DKK2	5.60401	0.149252	6.03565	4.50745	0.000450522	6.67013
MFAP4	5.63779	0.134698	7.6375	4.15419	0.000919171	8.46549
GNRH2	5.66352	0.178427	4.19093	7.39292	1.12436e-05	3.41243
THBD	5.70304	0.140827	6.43309	5.33291	4.49676e-05	6.70436
MTTP	5.7169	0.13879	6.44002	3.94078	0.00210518	7.41428
FRZB	5.74667	0.115406	9.33405	3.84629	0.00212885	10.3704
C1orf61	5.87825	0.116813	5.88326	9.43245	4.95806e-09	4.4322
TFEC	5.91986	0.187456	-0.978993	3.0643	0.0968078	4.24812
LOXL4	5.91986	0.187456	-0.978993	3.47933	0.0388594	4.0406
DLX5	5.91986	0.187456	-0.978993	6.0643	0.000874608	2.74812
LRRC19	5.91986	0.187456	-0.978993	6.0643	0.000874608	-0.965013
SMLR1	5.91986	0.187456	-0.978993	6.0643	0.000874608	-0.965013
KANK4	5.9448	0.112922	6.33157	2.90106	0.0439786	7.65836
PLA2G12B	5.95302	0.184199	-0.978993	5.09746	0.00343257	3.2647
USP9Y	5.95302	0.184199	-0.978993	6.09746	0.000809837	2.7647
TMEM88	5.96608	0.109189	6.07918	3.4071	0.0115241	7.32641
TUBB1	5.98544	0.179774	-0.978993	6.12988	0.000749801	2.78091
HAPLN1	5.99109	0.101918	6.85722	4.70549	0.000178567	7.62331
GBP4	6.01715	0.175283	-0.978993	4.57663	0.00775382	3.58925
KRT16	6.01715	0.175283	-0.978993	6.16159	0.000637279	2.79677
TCF21	6.03791	0.134698	4.37813	7.76731	2.51529e-06	-0.965013
RNASE1	6.04818	0.166822	-0.978993	4.60766	0.00727858	3.60476
HOXA13	6.04818	0.166822	-0.978993	6.19262	0.000589558	-0.965013
LINC01266	6.04818	0.166822	-0.978993	6.19262	0.000589558	2.81228
IGFBP3	6.07022	0.0894811	9.05725	4.10065	0.000972539	10.1282
SLC5A12	6.1001	0.0941114	6.99419	6.16654	1.67652e-06	7.04717
GBP2	6.13745	0.157568	-0.978993	2.82246	0.114197	4.58663
PUS7L	6.13745	0.157568	-0.978993	6.28189	0.000439965	-0.965013
PF4	6.14703	0.121512	4.43269	7.88596	1.64431e-06	-0.965013
HSPB7	6.16602	0.154824	-0.978993	2.73319	0.141313	4.542
HOXA11	6.16602	0.154824	-0.978993	6.31046	0.000410138	-0.965013
SI	6.16602	0.154824	-0.978993	6.31046	0.000410138	-0.965013
ALPK2	6.18009	0.107537	5.44922	5.32453	5.83347e-05	5.9632
SGCG	6.19403	0.150972	-0.978993	2.87904	0.101978	4.61492
TAL1	6.19403	0.150972	-0.978993	6.33847	0.000384699	2.88521
SERPINE3	6.27495	0.108631	4.49665	6.41939	2.09523e-05	4.51063
ALDH1A1	6.29017	0.0860802	6.50426	5.69765	1.12436e-05	6.88672
NR2F2-AS1	6.30095	0.142092	-0.978993	3.22299	0.0681849	4.13482
ACSL5	6.30095	0.142092	-0.978993	6.44539	0.000263075	-0.965013
HOXA10	6.30095	0.142092	-0.978993	6.44539	0.000263075	-0.965013
OSR1	6.31802	0.105125	4.51818	5.04742	0.000269881	5.23968
IHH	6.35157	0.134698	-0.978993	4.17408	0.0116742	4.12494
RGS13	6.35157	0.134698	-0.978993	6.49601	0.000213683	-0.965013
GJB1	6.40048	0.131371	-0.978993	4.54492	0.00563754	3.98843
CXorf36	6.42433	0.129274	-0.978993	6.56877	0.000178905	-0.965013
ABI3BP	6.44779	0.150972	3.99811	2.65	0.118118	5.94786
CD300E	6.44779	0.126888	-0.978993	6.59223	0.000156754	3.01209
HOXD4	6.44779	0.126888	-0.978993	6.59223	0.000156754	-0.965013
TECRL	6.44779	0.126888	-0.978993	6.59223	0.000156754	-0.965013
SOX17	6.49359	0.118476	-0.978993	6.63803	0.000140213	-0.965013
BNC1	6.50911	0.0743963	6.72921	6.89456	1.58466e-07	6.62268
C5orf66-AS1	6.51596	0.116813	-0.978993	6.6604	0.000130749	-0.965013
HOXB7	6.53798	0.115406	-0.978993	5.09746	0.00150205	3.84967
SULT2A1	6.53798	0.115406	-0.978993	6.68242	0.000117452	-0.965013
MMP1	6.58105	0.112795	-0.978993	5.72549	0.000484337	3.57872
SERPINC1	6.58105	0.112795	-0.978993	6.72549	0.000105082	3.07872
SERPIND1	6.60212	0.108631	-0.978993	6.74655	9.90251e-05	3.08925
LOC105369212	6.62287	0.107231	-0.978993	2.59739	0.157074	5.18459
LIPC	6.62287	0.107231	-0.978993	6.33847	0.000384699	-0.965013
ADH4	6.62287	0.107231	-0.978993	6.76731	8.7496e-05	-0.965013
HOXC5	6.62287	0.107231	-0.978993	6.76731	8.7496e-05	-0.965013
ADGRF5	6.64334	0.196431	3.09588	5.72549	0.000484337	3.57872
FETUB	6.64334	0.105962	-0.978993	6.78778	8.39292e-05	-0.965013
NEUROD6	6.64334	0.105962	-0.978993	6.78778	8.39292e-05	3.10986
SULT1E1	6.64334	0.105962	-0.978993	6.78778	8.39292e-05	-0.965013
TNNI1	6.6501	0.0820772	4.68422	2.59814	0.10916	6.7964
C1QTNF7	6.66352	0.104204	-0.978993	4.22299	0.00481186	4.41243
HBG2	6.68342	0.102734	-0.978993	6.82786	7.71889e-05	-0.965013
ESAM	6.70304	0.186678	3.12573	3.84748	0.0118774	4.63971
PLVAP	6.70304	0.126779	4.12573	5.52556	0.000160887	4.80068
MIR9-3HG	6.71759	0.0763922	5.13301	4.81794	0.000215491	6.12494
PRDM6	6.72241	0.122647	4.13542	4.84748	0.00775382	3.13971
ANKRD1	6.74152	0.181036	3.14497	2.97907	0.076974	5.1124
MLC1	6.74152	0.0979343	-0.978993	4.28189	0.00389747	4.44188
KRT24	6.76038	0.0960961	-0.978993	6.90482	6.11571e-05	-0.965013
AMBN	6.77899	0.0953564	-0.978993	6.92343	5.83347e-05	-0.965013
F2	6.79737	0.169778	3.1729	6.94181	5.35264e-05	-0.965013
HOXA10-HOXA9	6.81552	0.091445	-0.978993	6.95996	5.22957e-05	-0.965013
A1CF	6.83344	0.166628	3.19093	6.97788	5.00519e-05	-0.965013
LINC00261	6.83344	0.166628	3.19093	6.97788	5.00519e-05	-0.965013
PCK1	6.86863	0.0888634	-0.978993	4.01307	0.00769341	4.72251
KLB	6.8773	0.107384	4.21286	8.02173	1.00515e-06	-0.965013
AHNAK	6.89342	0.0464434	10.5608	3.14109	0.0184152	12.5231
APOH	6.90298	0.0862688	-0.978993	7.04742	4.18941e-05	3.23968
HOXA9	6.90298	0.0862688	-0.978993	7.04742	4.18941e-05	-0.965013
RPS4Y1	6.90298	0.0862688	-0.978993	7.04742	4.18941e-05	-0.965013
HOXB5	6.91986	0.0855754	-0.978993	4.47933	0.00199041	4.5406
SCRG1	6.93653	0.0843903	-0.978993	3.38053	0.0260787	5.10668
CSF3R	6.95302	0.0836204	-0.978993	4.5125	0.00187978	4.55718
SLC2A5	6.96932	0.0836204	-0.978993	3.82566	0.0118959	4.79873
ZFPM2	6.97741	0.0609752	5.26291	3.22721	0.0184624	7.16246
IGF2-AS	7.00139	0.0808295	-0.978993	2.68639	0.112272	5.5186
UBA7	7.00139	0.0808295	-0.978993	3.78487	0.0148764	4.41576
FAM107A	7.01192	0.0610159	4.86513	2.93396	0.0456183	6.99031
HOPX	7.01715	0.0806285	-0.978993	4.57663	0.00153697	4.58925
PLEK	7.03275	0.0799342	-0.978993	3.71776	0.0106623	5.03428
EGFLAM	7.05583	0.0931456	4.30213	4.49983	0.000875046	5.66633
SLPI	7.0935	0.0771174	-0.978993	4.65298	0.00122009	4.62742
LOC105371455	7.0935	0.0771174	-0.978993	7.23794	2.06377e-05	3.33494
PRDM12	7.1518	0.0723947	-0.978993	3.38935	0.0254852	5.31754
PAPPA	7.16743	0.043713	6.67985	3.03891	0.0261805	9.04278
CDX2	7.19403	0.0703124	-0.978993	7.33847	1.36828e-05	-0.965013
WNT7A	7.27495	0.118155	3.41169	2.77553	0.0920668	5.7476
THCAT155	7.28801	0.116156	3.41821	2.52556	0.156616	5.88564
BRINP3	7.30095	0.0624456	-0.978993	3.20789	0.0325631	5.31992
MYL4	7.30095	0.0624456	-0.978993	6.44539	4.9344e-05	3.93866
UGT2B11	7.30095	0.0624456	-0.978993	7.44539	9.19538e-06	-0.965013
HNF4A	7.35157	0.0609752	-0.978993	6.49601	4.18941e-05	3.96398
APOB	7.36306	0.0334631	9.83078	9.35898	8.97109e-12	8.91902
HOXB6	7.37623	0.0609752	-0.978993	7.52067	6.97398e-06	-0.965013
PPBP	7.39446	0.0737065	4.47144	8.5389	1.39565e-07	-0.965013
EPHA5	7.40448	0.0451827	5.06142	2.8763	0.0499339	7.30387
G0S2	7.41444	0.0421052	6.06639	5.49999	1.95679e-05	7.10982
GATA3	7.48228	0.0996647	3.51535	2.45679	0.157931	6.11429
HOXB9	7.52701	0.0551486	-0.978993	7.67145	3.55042e-06	3.5517
FMO1	7.54887	0.0943719	3.54865	4.29624	0.00309459	4.86409
SLC39A5	7.54887	0.0943719	3.54865	6.10835	5.83411e-05	4.35511
HOXC4	7.58105	0.0919052	3.56474	6.14053	5.35264e-05	4.3712
HGF	7.61771	0.0609752	4.58307	3.00287	0.0363571	6.94533
CRHBP	7.64334	0.0493468	-0.978993	4.61785	0.00102385	5.19482
TBX4	7.69326	0.0470691	-0.978993	5.16159	0.00127624	3.88173
LOC107986058	7.70304	0.0466061	-0.978993	5.26252	0.000160887	4.9322
HOXB8	7.732	0.0451827	-0.978993	3.176	0.0270631	6.00441
ANXA8L1	7.732	0.0451827	-0.978993	7.87644	1.64431e-06	-0.965013
HBE1	7.76038	0.0441565	-0.978993	7.90482	1.58736e-06	3.66838
FOXF1	7.76972	0.0440905	-0.978993	3.05617	0.0401279	6.10204
LHX2	7.79432	0.0342751	5.25634	2.72931	0.0681849	7.87504
SLC22A7	7.82451	0.0431737	-0.978993	6.39292	5.43785e-05	3.91243
ALB	7.82451	0.0786574	3.68647	6.96895	6.93851e-06	4.20045
PKHD1L1	7.83344	0.033137	5.27589	6.97788	2.94288e-07	5.78987
OLR1	7.84232	0.0427565	-0.978993	7.98676	1.13075e-06	-0.965013
AKR1D1	7.85114	0.0425703	-0.978993	7.99558	1.08213e-06	3.71376
HOXC6	7.86863	0.0418624	-0.978993	8.01307	1.03273e-06	3.72251
SLCO2B1	8.03275	0.0364351	-0.978993	5.85526	5.61803e-05	4.96553
AKR1B10	8.13022	0.0342488	-0.978993	8.27466	3.47272e-07	3.8533
MPO	8.17307	0.0609752	3.86075	8.31751	2.98644e-07	-0.965013
HOXB4	8.18708	0.0324515	-0.978993	8.33152	2.94288e-07	-0.965013
HOXC8	8.24848	0.0314272	-0.978993	8.39292	2.28471e-07	-0.965013
FIBIN	8.32648	0.0309848	-0.978993	3.61294	0.00840283	6.38042
AGTR1	8.33279	0.0526011	3.94061	8.47723	1.70527e-07	-0.965013
FMOD	8.3495	0.0206434	5.53392	3.16293	0.0209319	7.85202
EOMES	8.38841	0.0499019	3.96842	2.89583	0.0487796	6.68745
GATA5	8.43611	0.0273831	-0.978993	4.67365	0.000497124	5.95969
RBP2	8.45359	0.0471764	4.00101	8.59803	1.11915e-07	-0.965013
PITX2	8.50295	0.0178993	5.61065	7.91043	2.39375e-08	5.99311
CD93	8.50482	0.0451827	4.02662	7.0643	1.64431e-06	4.83308
WISP1	8.52701	0.0246495	-0.978993	2.42602	0.153646	7.1578
NPNT	8.52921	0.0148258	7.94571	8.39773	3.30949e-10	8.08476
GATA6-AS1	8.53251	0.0246495	-0.978993	8.67695	8.9373e-08	-0.965013
HOXB2	8.54887	0.0243738	-0.978993	5.88596	1.83261e-05	5.46631
NEUROG2	8.63314	0.0220814	-0.978993	5.45565	6.05893e-05	5.76573
POSTN	8.6468	0.0126516	9.55704	3.7421	0.0029752	11.869
MEP1A	8.69326	0.0203608	-0.978993	8.8377	4.70162e-08	-0.965013
NR2E1	8.71759	0.0198146	-0.978993	3.02914	0.0327126	7.06343
PECAM1	8.83344	0.0355586	4.19093	6.97788	1.26982e-06	5.20491
COL6A3	8.87651	0.0123117	7.6719	2.89902	0.0377392	10.7429
TF	8.90722	0.0340266	4.22782	3.94289	0.00265924	6.77488
RBP4	8.93488	0.0130114	6.56358	3.93364	0.00174841	9.1504
ANXA8	8.95712	0.0160683	-0.978993	8.10155	9.62652e-08	4.76675
GUCY1A1	9.01715	0.0155075	-0.978993	3.3941	0.0129218	6.90488
TBX20	9.03662	0.0314272	4.29252	9.18106	1.25778e-08	-0.965013
REN	9.04818	0.0154191	-0.978993	5.28573	6.31454e-05	6.26573
NEUROD1	9.05583	0.0154191	-0.978993	3.41891	0.0114526	7.20679
GSTA1	9.08605	0.0153568	-0.978993	6.64552	1.08213e-06	5.6237
H19	9.0935	0.0119417	7.32096	7.33105	1.43928e-08	8.28839
ITIH2	9.10462	0.0151859	-0.978993	7.66409	1.66696e-07	5.13298
GSTA2	9.14105	0.0148258	-0.978993	9.28549	9.31475e-09	-0.965013
DNM3OS	9.34534	0.0131101	-0.978993	5.16159	9.83353e-05	5.7562
HOXB3	9.35468	0.0130158	-0.978993	8.42593	2.57013e-08	4.92894
FOXG1	9.40048	0.0148258	5.47445	10.5449	7.26942e-11	4.98843
LINC02381	9.44779	0.0124071	-0.978993	2.75934	0.0615226	7.92853
RELN	9.46686	0.00784576	7.82957	3.10509	0.020956	11.0967
LINC01551	9.54616	0.0121331	-0.978993	9.6906	1.74004e-09	4.56127
HAND2-AS1	9.57041	0.0119417	-0.978993	9.71485	1.62802e-09	4.5734
MEIS1	9.63314	0.017296	4.59078	2.83507	0.0495097	8.07602
TBR1	9.72961	0.0159734	4.63901	6.87404	3.18835e-07	6.15299
AGT	9.81552	0.0154191	4.68197	3.12707	0.0219443	8.1124
FABP1	9.93446	0.00992896	-0.978993	10.0789	3.75815e-10	-0.965013
SLC40A1	10.0386	0.0106969	5.79349	5.07736	5.00519e-05	8.36318
GATA6	10.0501	0.00852661	-0.978993	8.60957	4.95806e-09	5.60572
PITX1	10.1783	0.00719147	-0.978993	7.73782	1.70165e-08	6.16984
HAND2	10.2027	0.00698269	-0.978993	9.34711	7.19379e-10	5.38953
SERPINA1	10.3562	0.00562729	-0.978993	10.5007	7.26942e-11	-0.965013
PLG	10.6357	0.0048856	-0.978993	10.7801	4.13087e-11	-0.965013
NPR3	10.6735	0.0101177	5.11096	3.2557	0.0143129	8.90606
VTN	10.7224	0.0048856	-0.978993	4.77939	0.000124478	8.19313
AFP	10.7405	0.0029256	10.9518	15.6945	3.71736e-21	8.56323
AHSG	10.7763	0.00346542	6.74732	11.5057	2.67999e-13	6.46882
INS-IGF2	11.0241	0.00259627	10.1442	4.68719	0.000128214	13.3989
IGF2	11.0243	0.00259627	10.1443	4.71201	0.000118393	13.4465
LINC00461	11.2334	0.00540678	5.3909	4.66551	0.000168905	8.74917
APOA4	11.3217	0.0029961	-0.978993	11.4662	2.15503e-12	5.44906
FGG	11.3724	0.0029961	-0.978993	11.5344	1.93203e-12	-0.965013
HAND1	11.5394	0.0029256	-0.978993	9.09951	7.66606e-11	6.85069
APOA1	11.6323	0.00259627	7.17532	8.36169	2.29973e-10	8.89682
APOA2	11.6554	0.00425268	5.60189	11.7998	6.11401e-13	-0.965013
FGA	11.7651	0.00259627	-0.978993	11.9095	4.40754e-13	-0.965013
APOC3	11.8848	0.00259627	-0.978993	12.0293	2.80833e-13	-0.965013
FGB	12.3636	0.0023217	-0.978993	12.5099	6.84564e-14	-0.965013
